# Supplementary material for: Induction of Sertoli-like cells from human fibroblasts by NR5A1 and GATA4
Source: eLife journal article supplement (doi:10.7554/elife.48767), 2019-11-11
Supplement: supp [file elife-48767-supp-v1.zip]

Archive with 18 entries (18 files):
- elife_poa_e48767_Figure_6_figure_supplement_4.pdf
- elife_poa_e48767_Figure_3_figure_supplement_4.pdf
- elife_poa_e48767_Figure_4_figure_supplement_1.pdf
- elife_poa_e48767_Figure_7_figure_supplement_2.pdf
- elife_poa_e48767_Figure_1_figure_supplement_3.pdf
- elife_poa_e48767_Figure_3_figure_supplement_2.pdf
- elife_poa_e48767_Figure_6_figure_supplement_2.pdf
- elife_poa_e48767_Figure_1_figure_supplement_1.pdf
- elife_poa_e48767_Figure_5_figure_supplement_2.pdf
- elife_poa_e48767_Figure_6_figure_supplement_3.pdf
- elife_poa_e48767_Figure_3_figure_supplement_3.pdf
- elife_poa_e48767_Figure_3_figure_supplement_1.pdf
- elife_poa_e48767_Figure_5_figure_supplement_1.pdf
- elife_poa_e48767_Figure_6_figure_supplement_1.pdf
- elife_poa_e48767_Figure_3_figure_supplement_5.pdf
- elife_poa_e48767_Transparent_Reporting_File.docx
- elife_poa_e48767_Figure_1_figure_supplement_2.pdf
- elife_poa_e48767_Figure_7_figure_supplement_1.pdf
