# Supplementary material for: Induction of Sertoli-like cells from human fibroblasts by NR5A1 and GATA4
Source: eLife journal article supplement (doi:10.7554/elife.48767), 2019-11-11
Supplement: supp [file elife-48767-supp-v1.zip › elife_poa_e48767_Figure_3_figure_supplement_4.pdf]

Figure 3-figure supplement 4

**A**

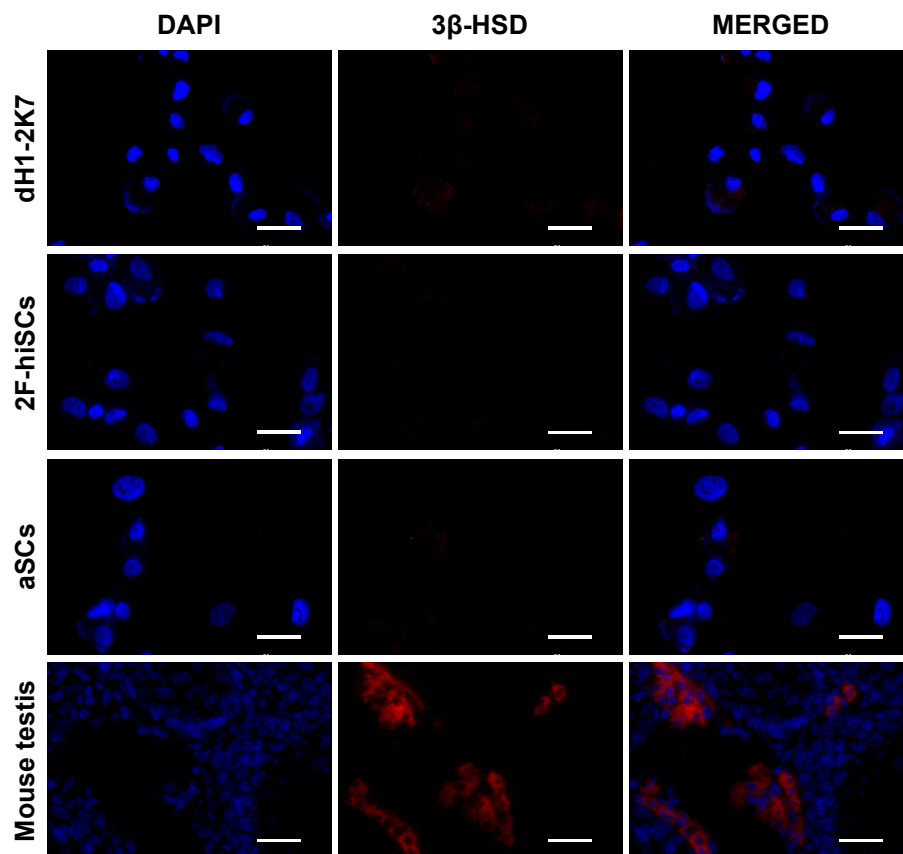

**B**

| Leydig cell markers | aSC-1 | aSC-2 | dH1-2K7-1 | dH1-2K7-2 | 2F-hiSCs-<br>(dH1)-1 | 2F-hiSCs-<br>(dH1)-2 | 5F-hiSCs-<br>(dH1)-1 | 5F-hiSCs-<br>(dH1)-2 |
|---------------------|-------|-------|-----------|-----------|----------------------|----------------------|----------------------|----------------------|
| INSL3               | 0     | 1     | 0         | 0         | 3                    | 0                    | 0                    | 0                    |
| MYH11               | 0     | 1     | 0         | 0         | 0                    | 0                    | 0                    | 0                    |
| ALDH1A1             | 9     | 3     | 0         | 0         | 0                    | 0                    | 0                    | 0                    |
| IGF1                | 1     | 7     | 0         | 0         | 0                    | 0                    | 0                    | 0                    |
| HSD17B3             | 0     | 0     | 0         | 0         | 0                    | 0                    | 2                    | 1                    |
| STAR                | 69    | 106   | 0         | 0         | 135                  | 65                   | 48                   | 50                   |
| CFTR                | 0     | 0     | 0         | 0         | 0                    | 0                    | 0                    | 0                    |
| ABCC9               | 1     | 1     | 1         | 1         | 1                    | 1                    | 0                    | 0                    |
| PGD                 | 114   | 126   | 104       | 102       | 61                   | 54                   | 111                  | 111                  |
| HSD3B1              | 0     | 0     | 0         | 0         | 0                    | 0                    | 0                    | 0                    |
