# Supplementary figures and images for: Induction of Sertoli-like cells from human fibroblasts by NR5A1 and GATA4
Source: eLife journal article supplement (doi:10.7554/elife.48767), 2019-11-11

**Figure 6-figure supplement 4**

A

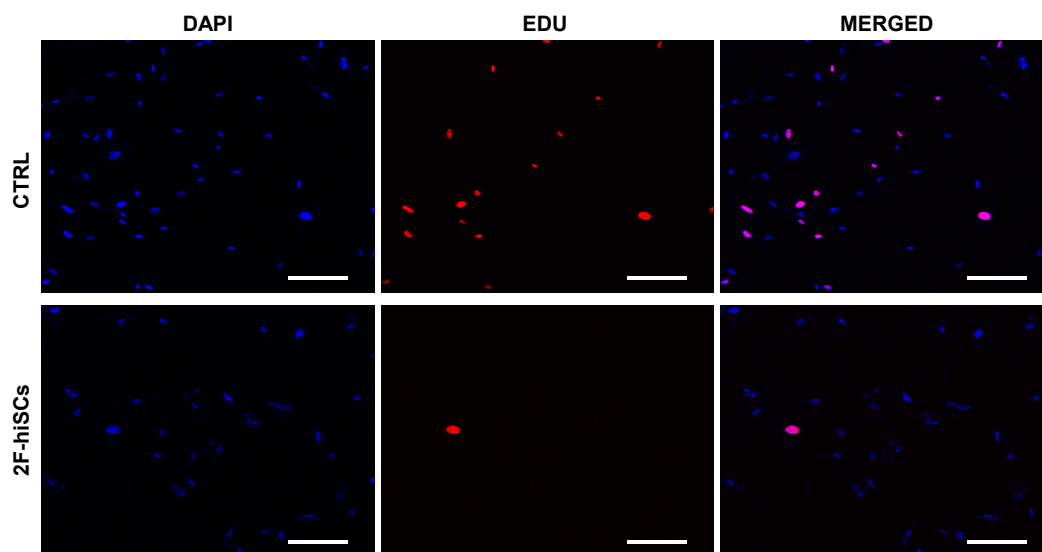

B

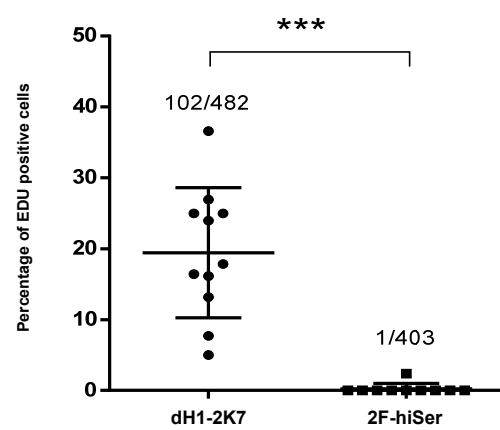

Supplement: supp [file elife-48767-supp-v1.zip › elife_poa_e48767_Figure_6_figure_supplement_4.pdf]

Figure 4-figure supplement 1

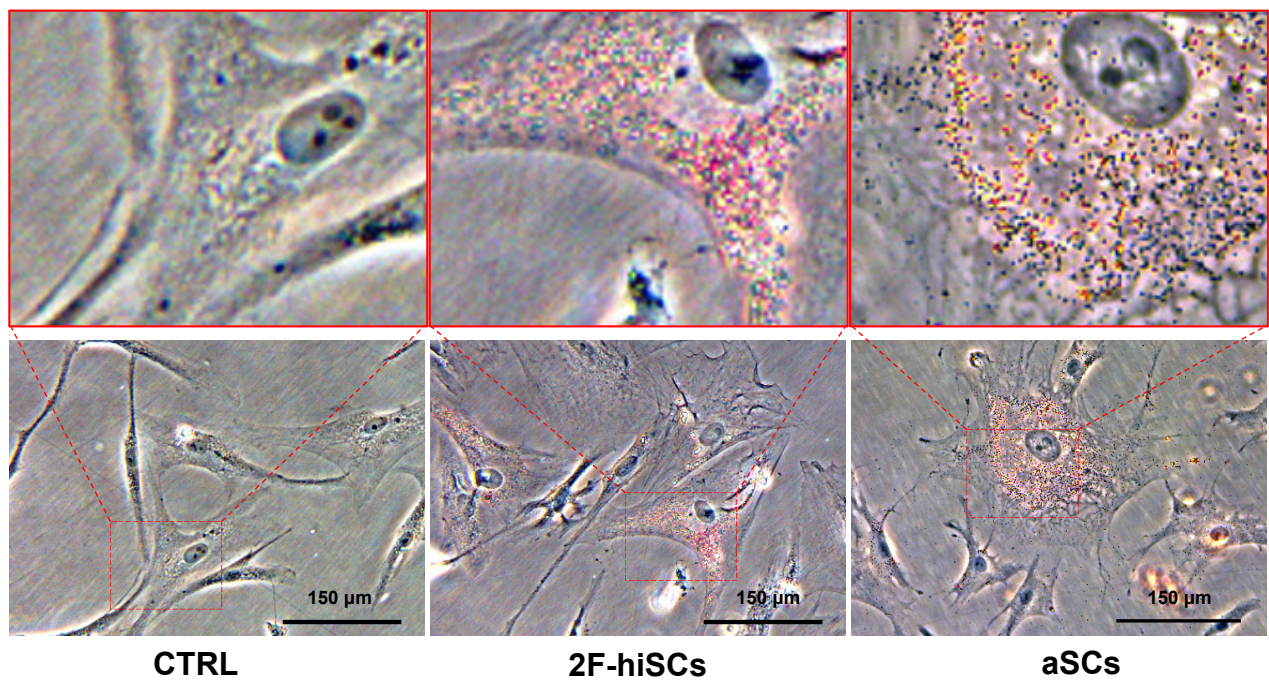

Supplement: supp [file elife-48767-supp-v1.zip › elife_poa_e48767_Figure_4_figure_supplement_1.pdf]

Figure 7-figure supplement 2

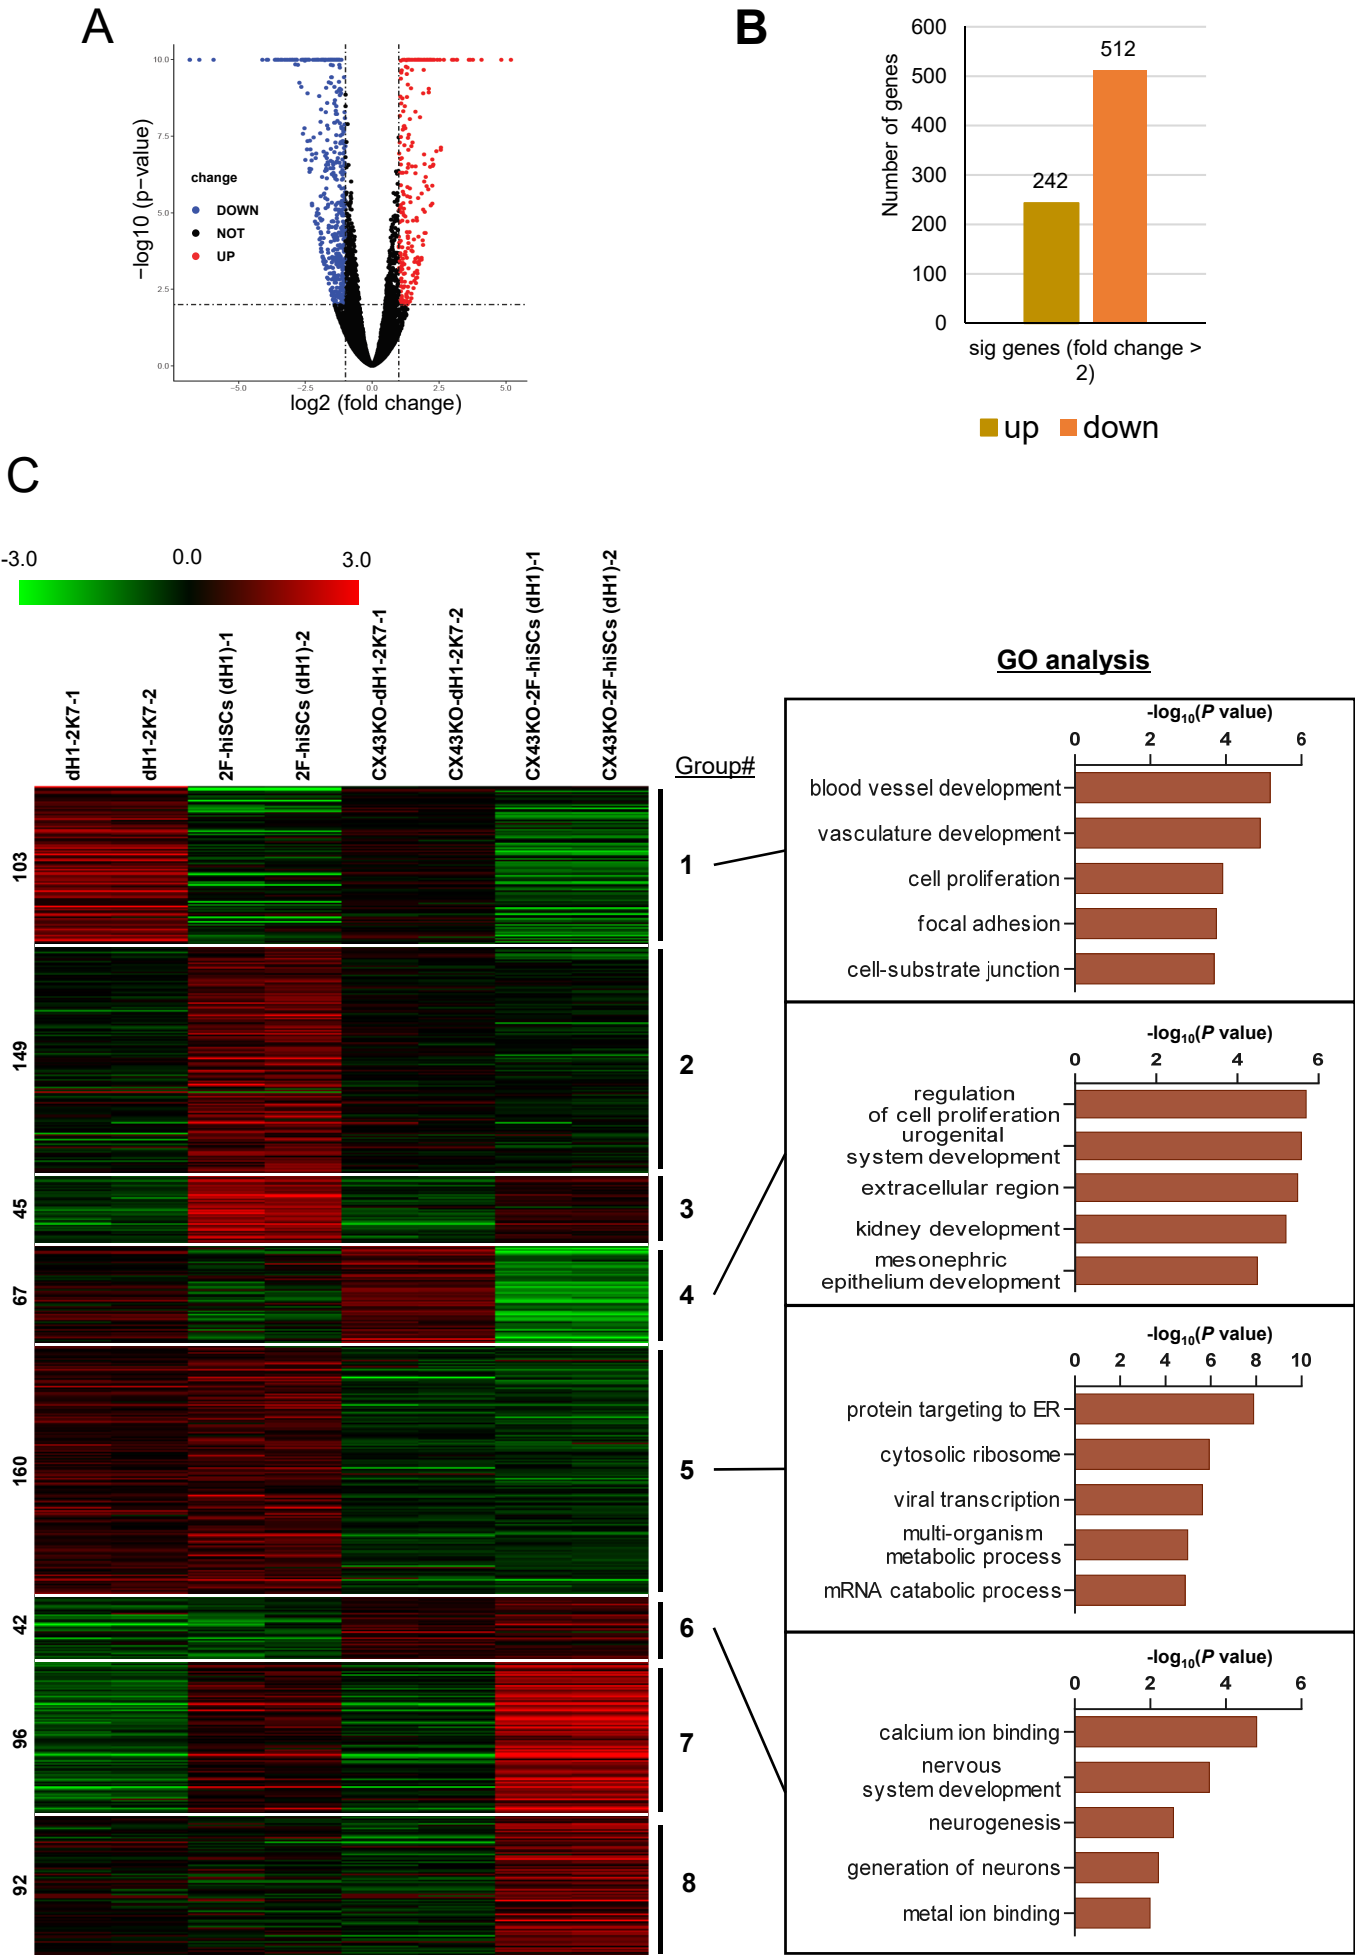

Supplement: supp [file elife-48767-supp-v1.zip › elife_poa_e48767_Figure_7_figure_supplement_2.pdf]

Figure 1-figure supplement 3

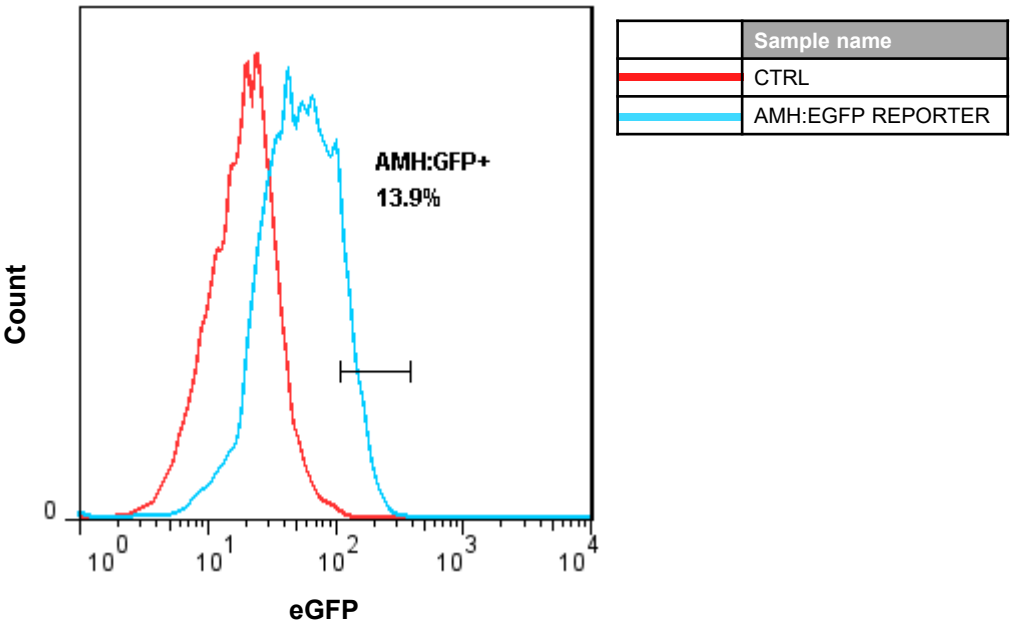

Supplement: supp [file elife-48767-supp-v1.zip › elife_poa_e48767_Figure_1_figure_supplement_3.pdf]

Figure 3-figure supplement 2

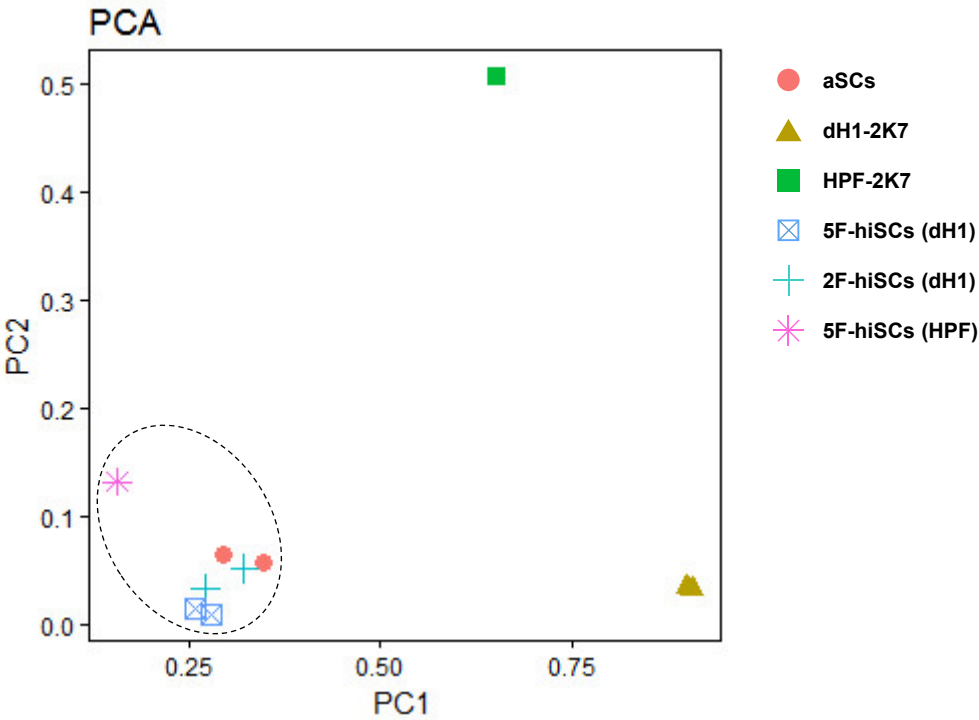

Supplement: supp [file elife-48767-supp-v1.zip › elife_poa_e48767_Figure_3_figure_supplement_2.pdf]

Figure 6-figure supplement 2

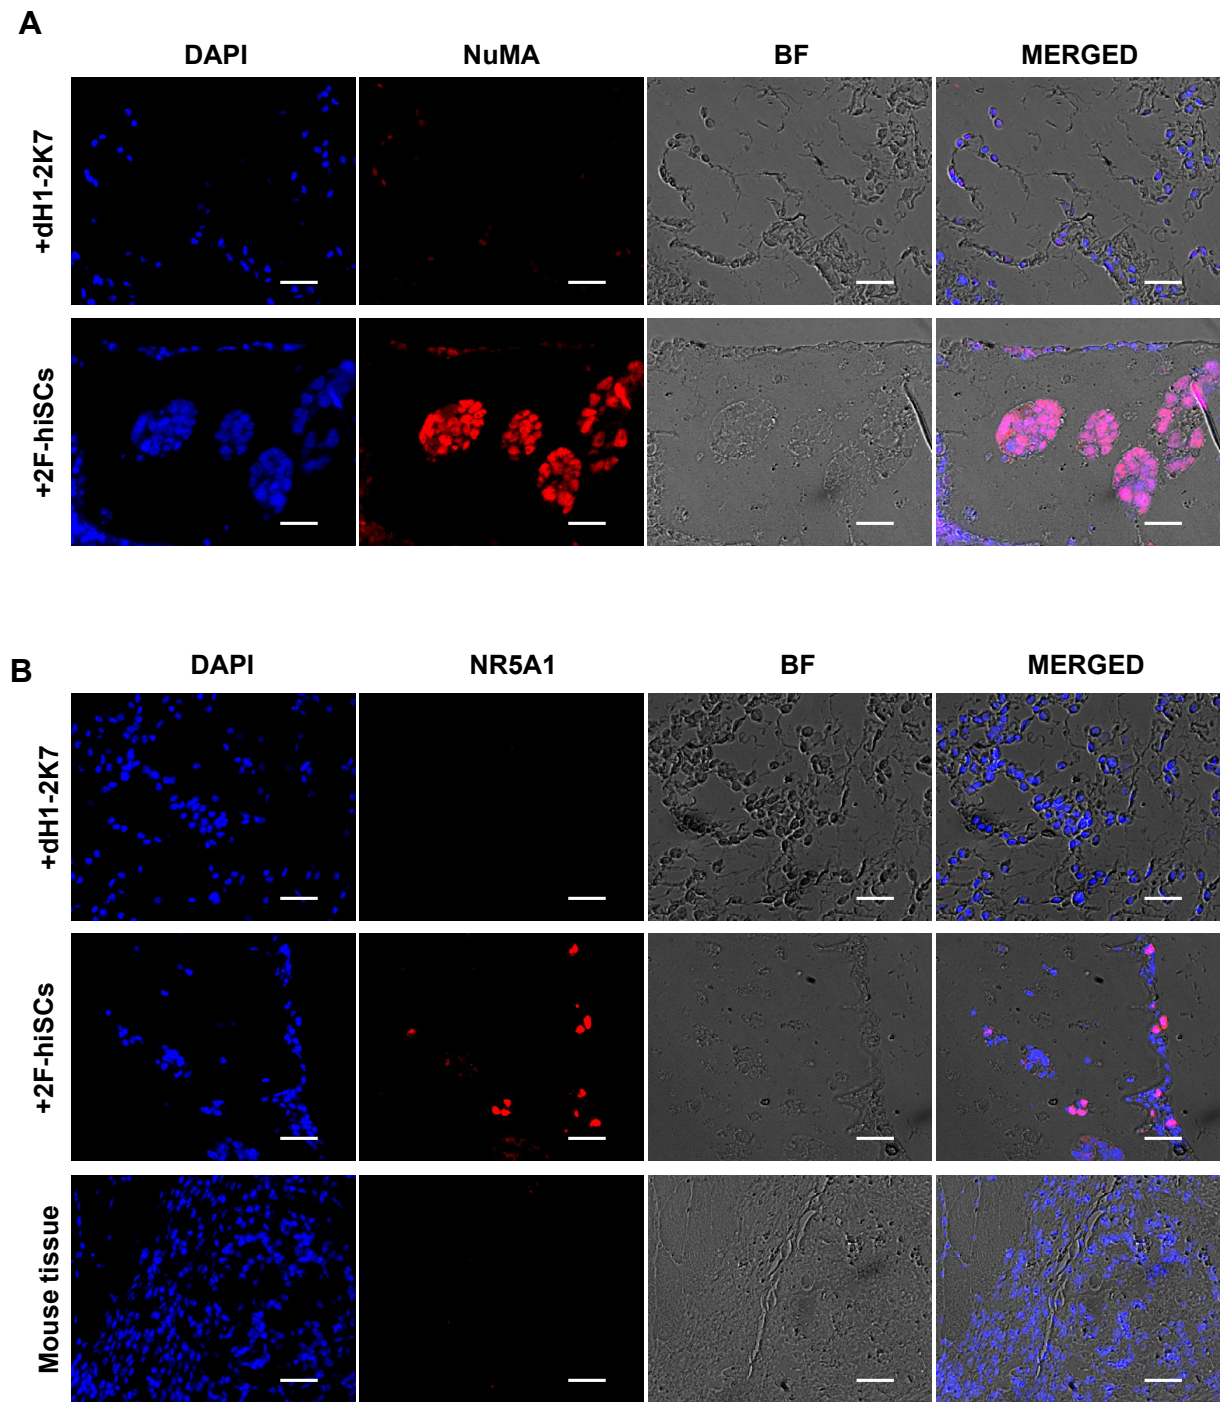

Supplement: supp [file elife-48767-supp-v1.zip › elife_poa_e48767_Figure_6_figure_supplement_2.pdf]

Figure 1-figure supplement 1

A

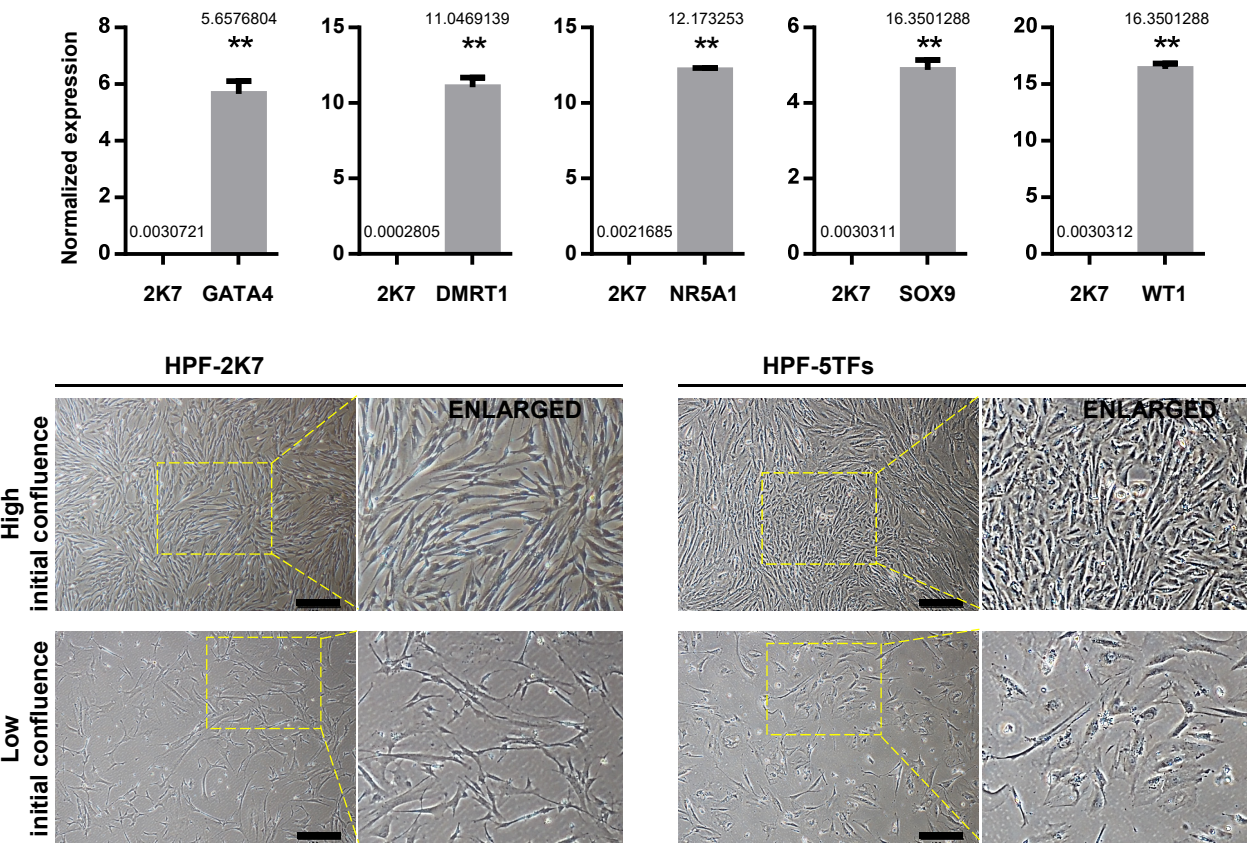

C

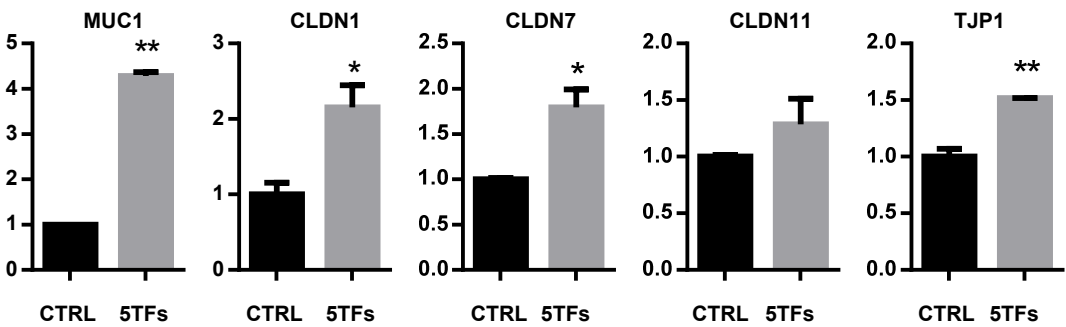

D

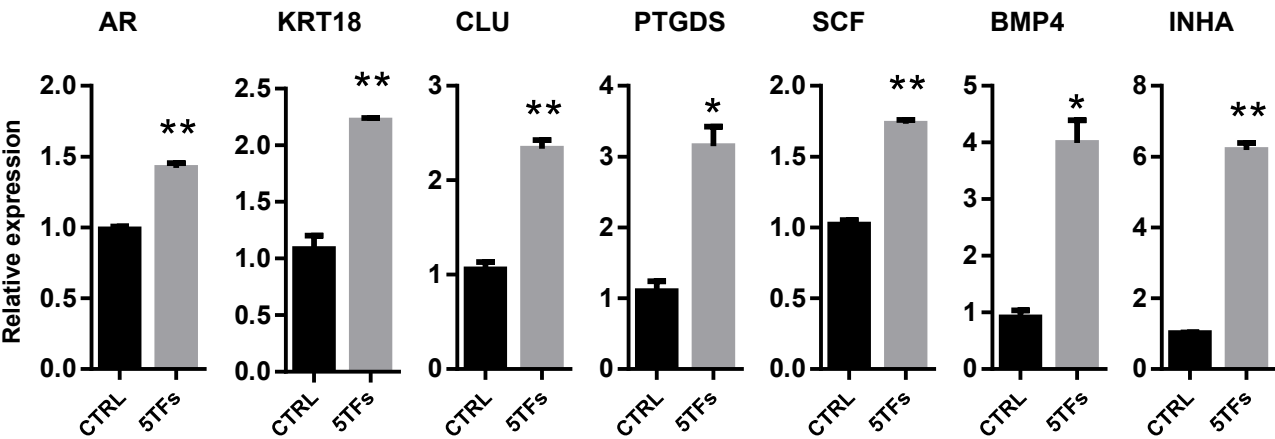

Supplement: supp [file elife-48767-supp-v1.zip › elife_poa_e48767_Figure_1_figure_supplement_1.pdf]

Figure 5-figure supplement 2

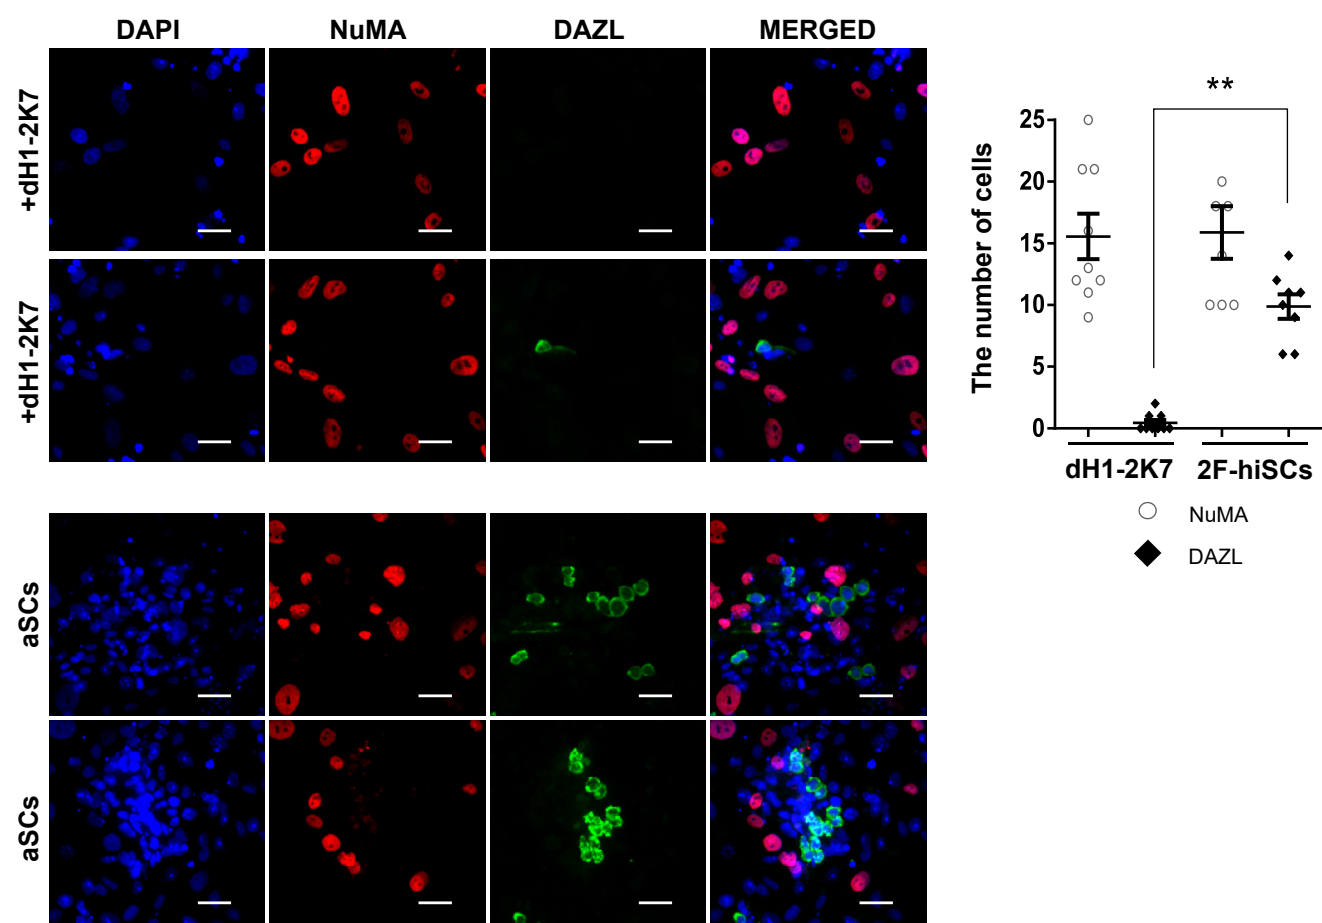

Supplement: supp [file elife-48767-supp-v1.zip › elife_poa_e48767_Figure_5_figure_supplement_2.pdf]

Figure 6-figure supplement 3

**A**

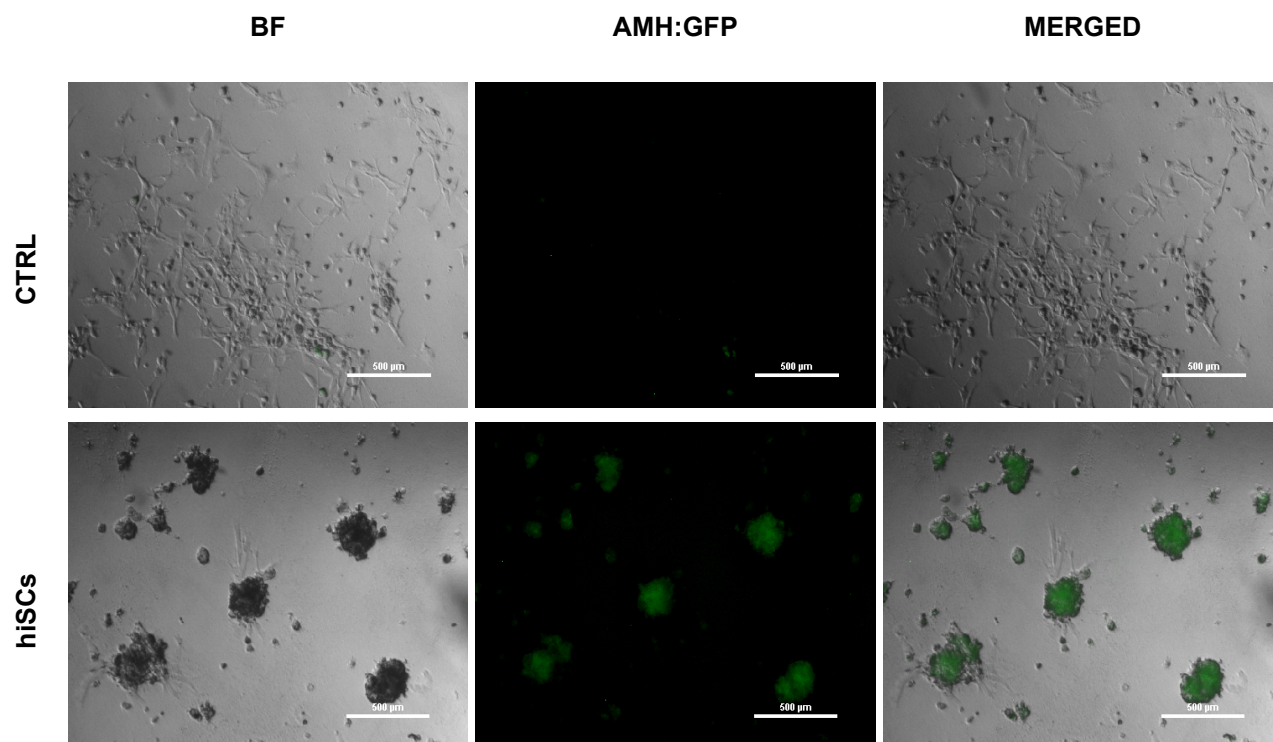

**B**

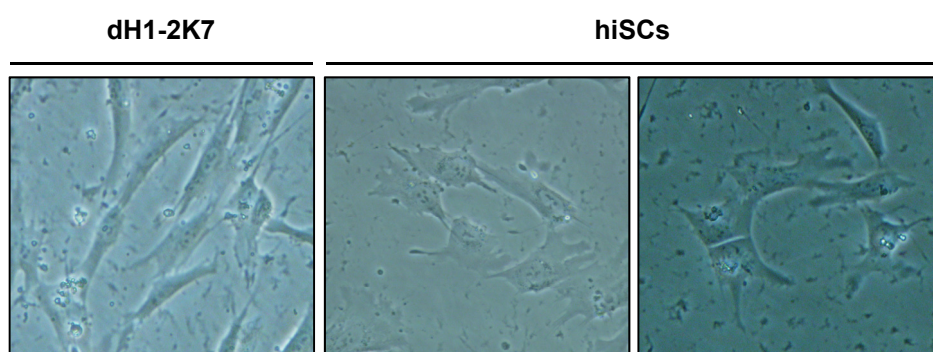

Supplement: supp [file elife-48767-supp-v1.zip › elife_poa_e48767_Figure_6_figure_supplement_3.pdf]

Figure 3-figure supplement 3

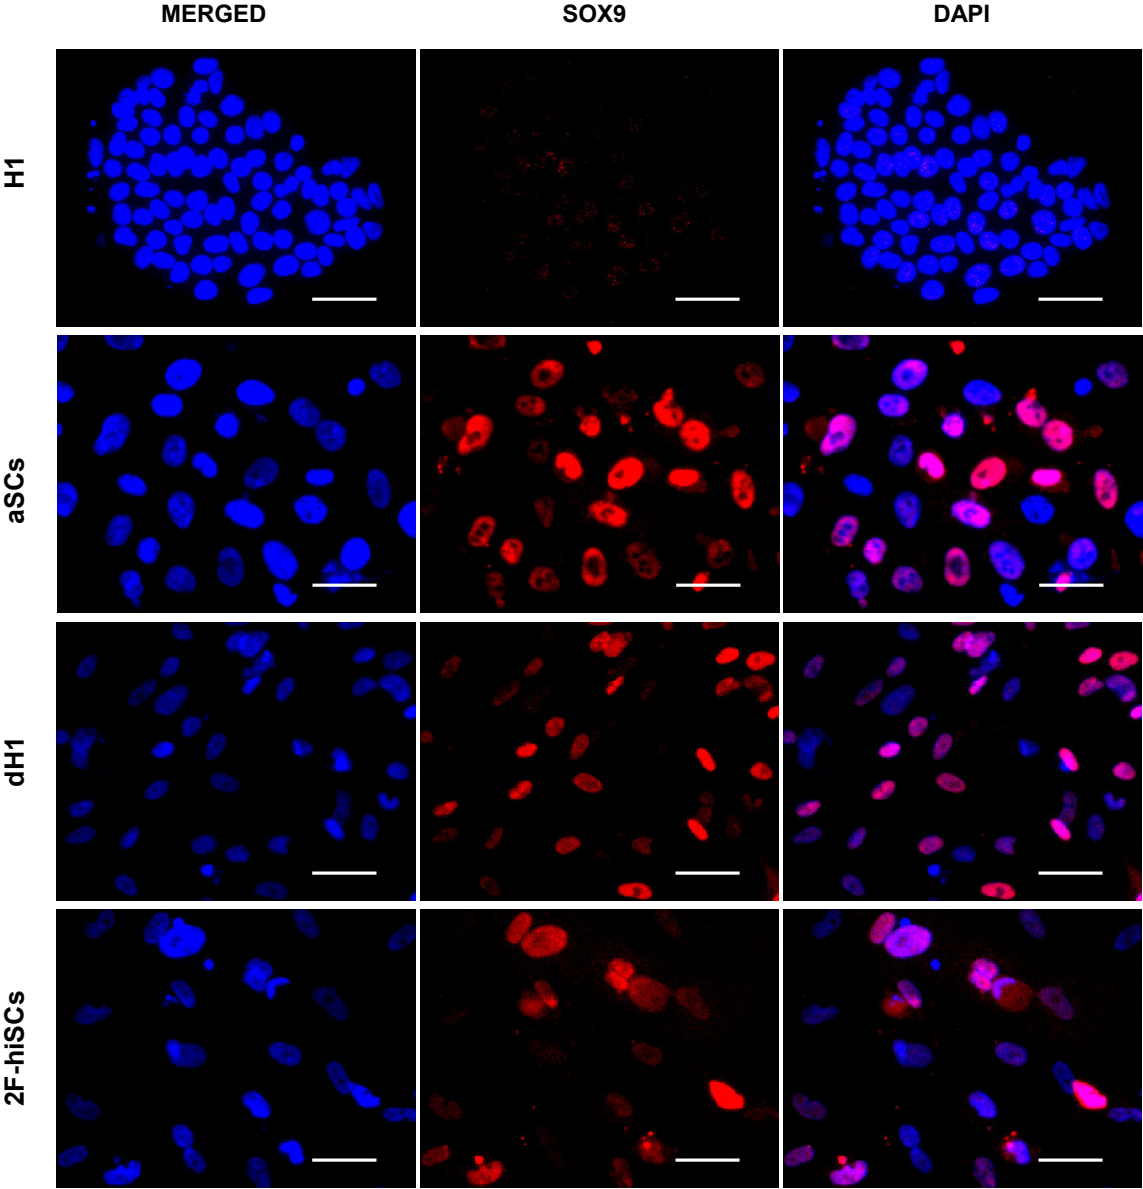

Supplement: supp [file elife-48767-supp-v1.zip › elife_poa_e48767_Figure_3_figure_supplement_3.pdf]

Figure 3-figure supplement 1

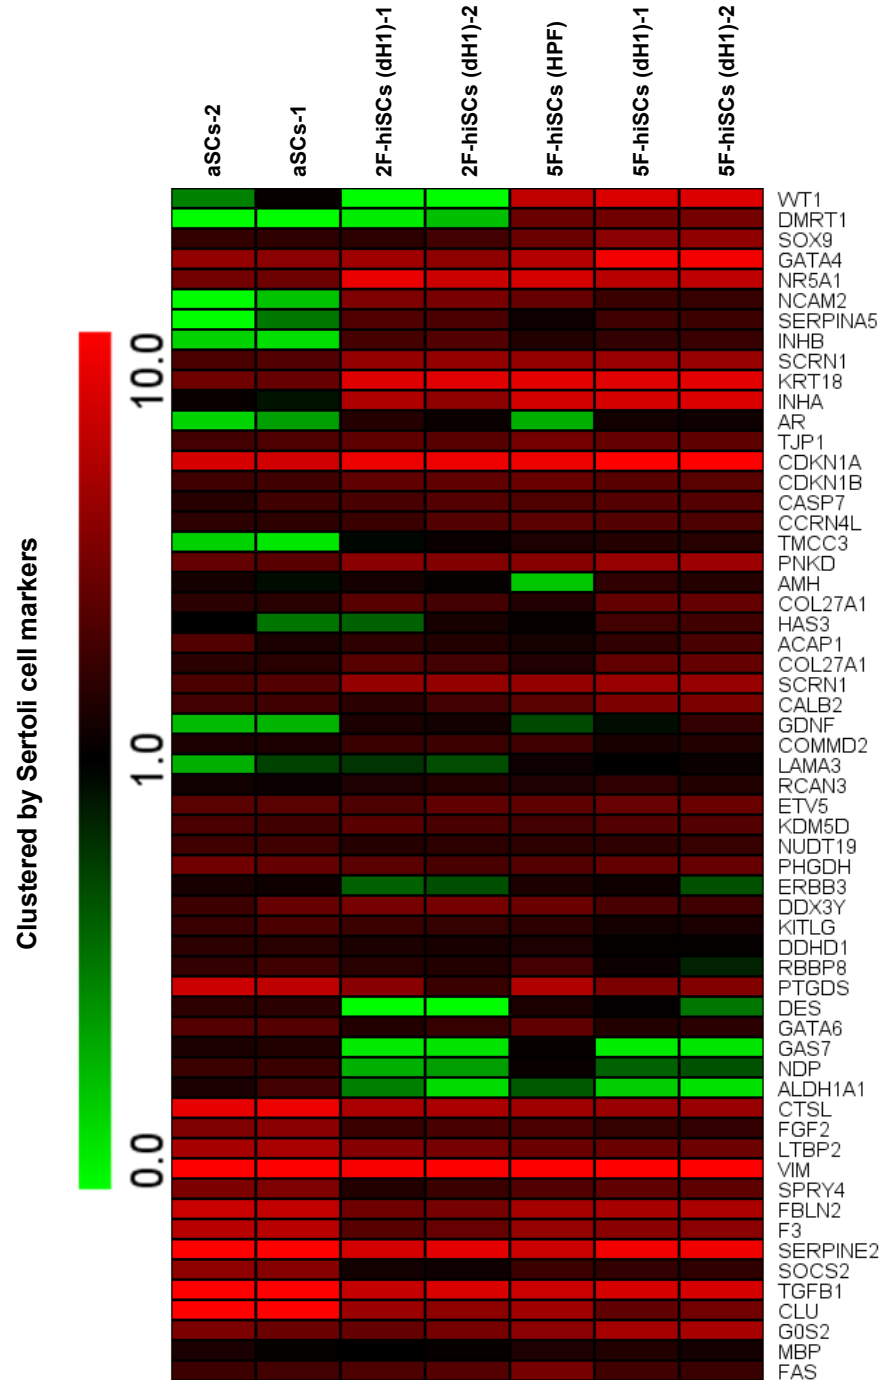

Supplement: supp [file elife-48767-supp-v1.zip › elife_poa_e48767_Figure_3_figure_supplement_1.pdf]

Figure 5-figure supplement 1

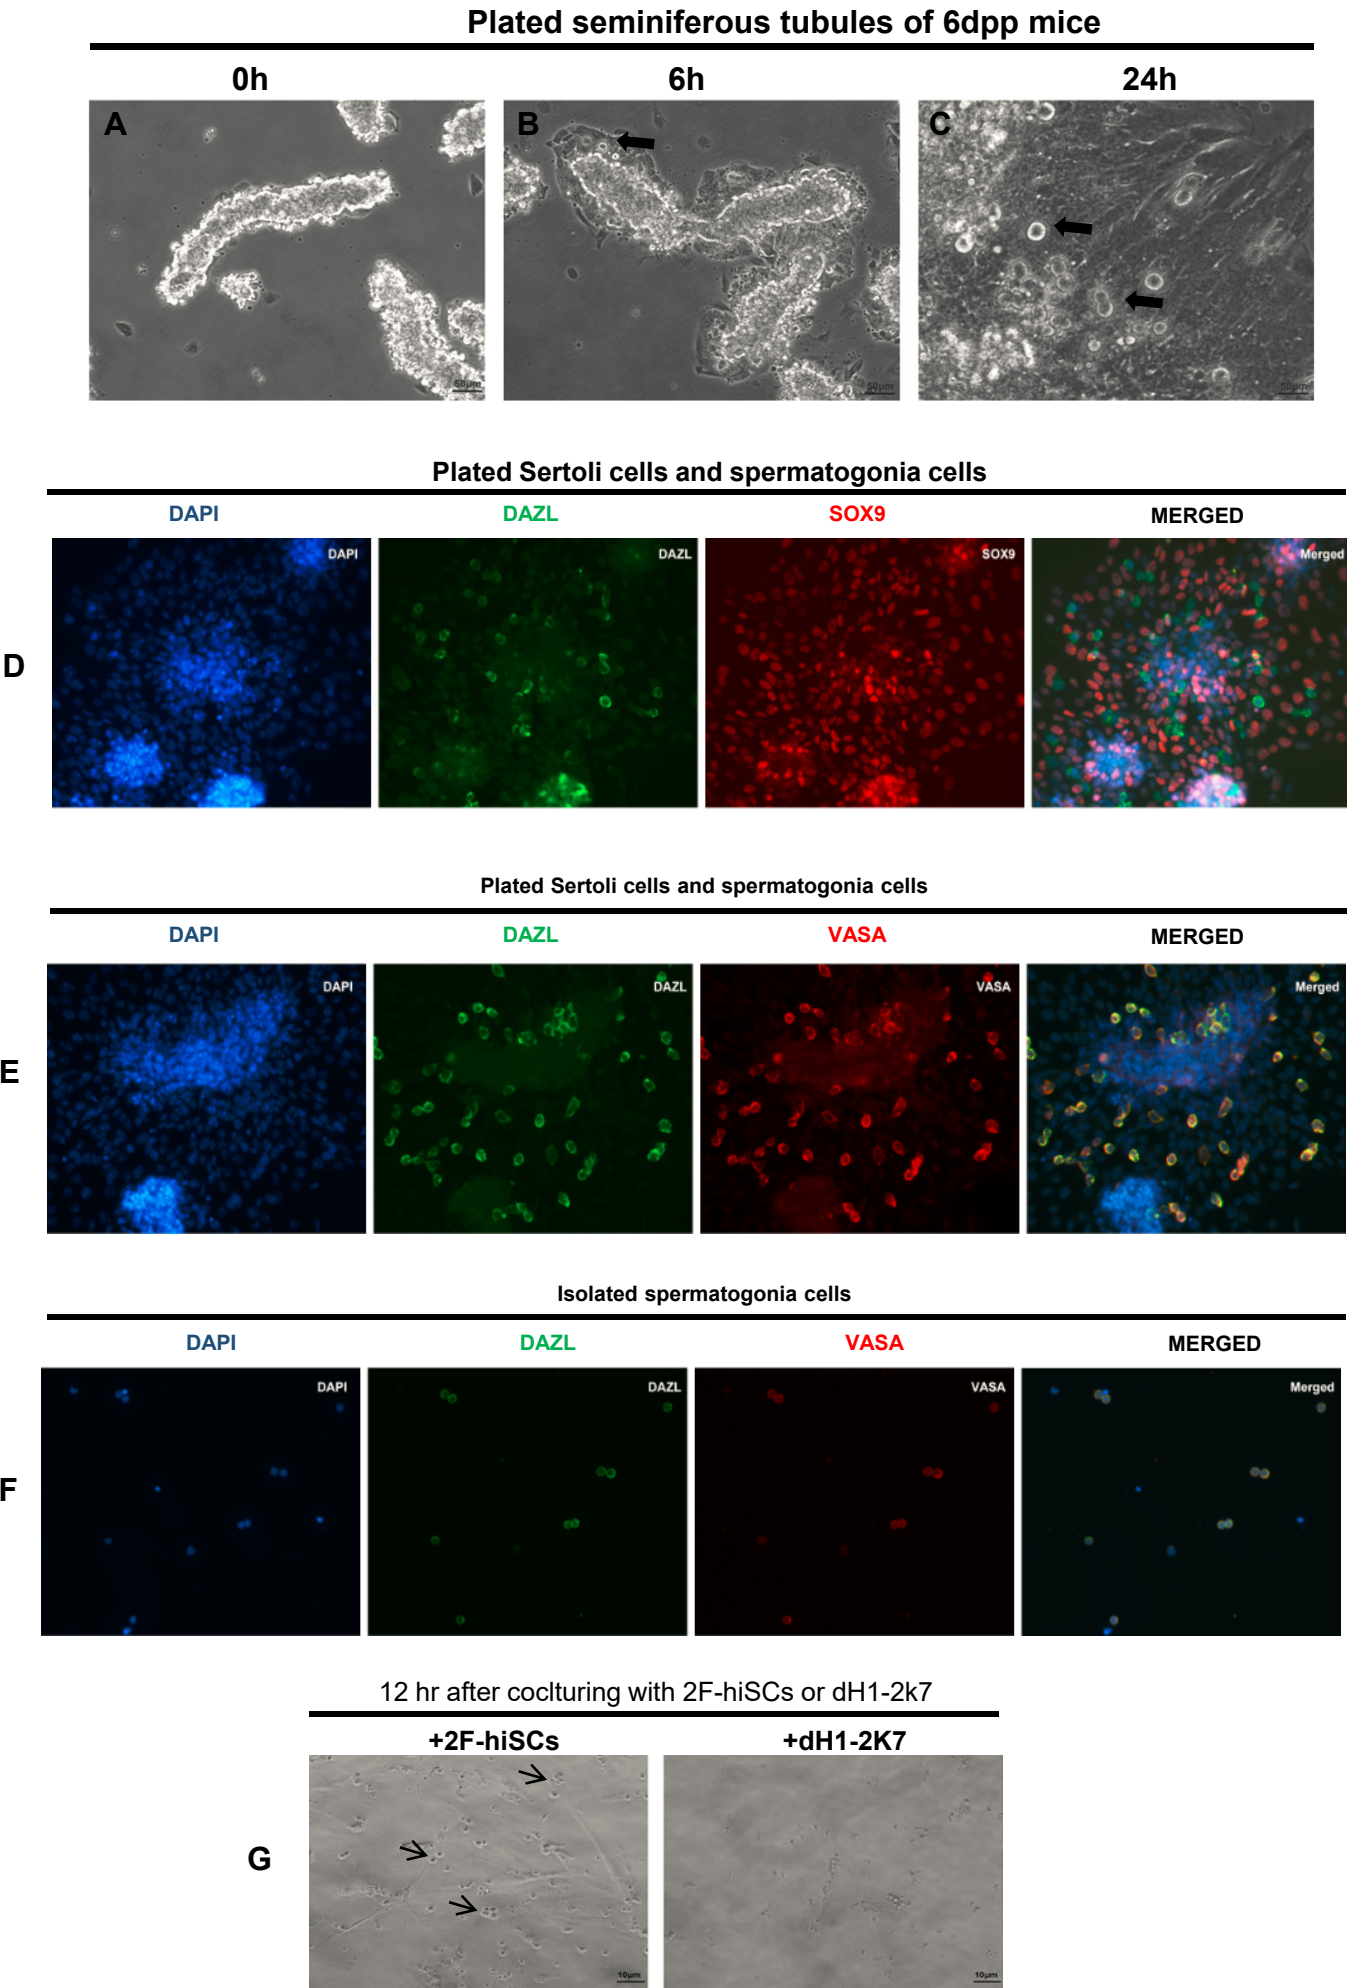

Supplement: supp [file elife-48767-supp-v1.zip › elife_poa_e48767_Figure_5_figure_supplement_1.pdf]

Figure 6-figure supplement 1

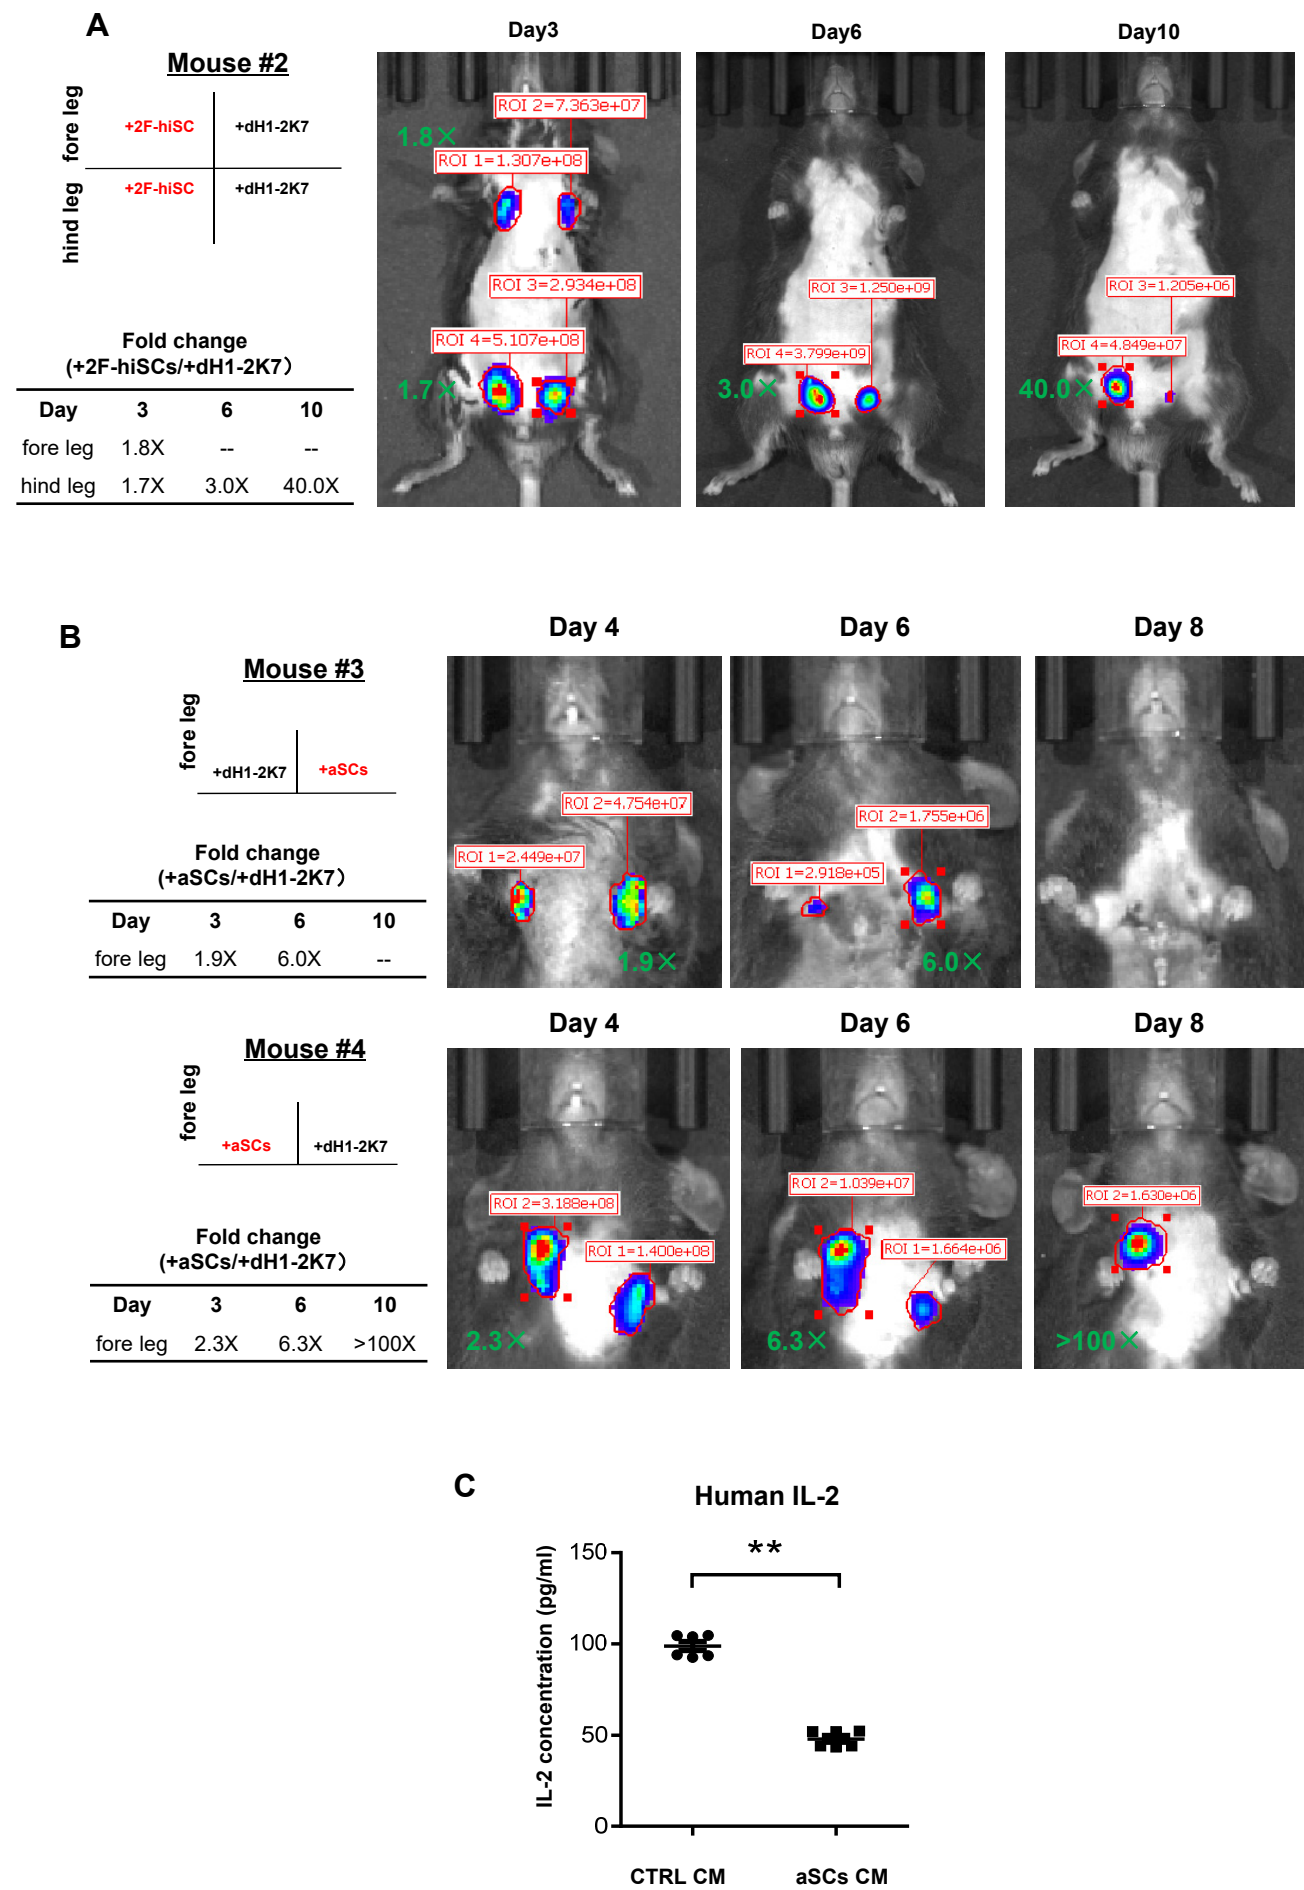

Supplement: supp [file elife-48767-supp-v1.zip › elife_poa_e48767_Figure_6_figure_supplement_1.pdf]

Figure 3-figure supplement 5

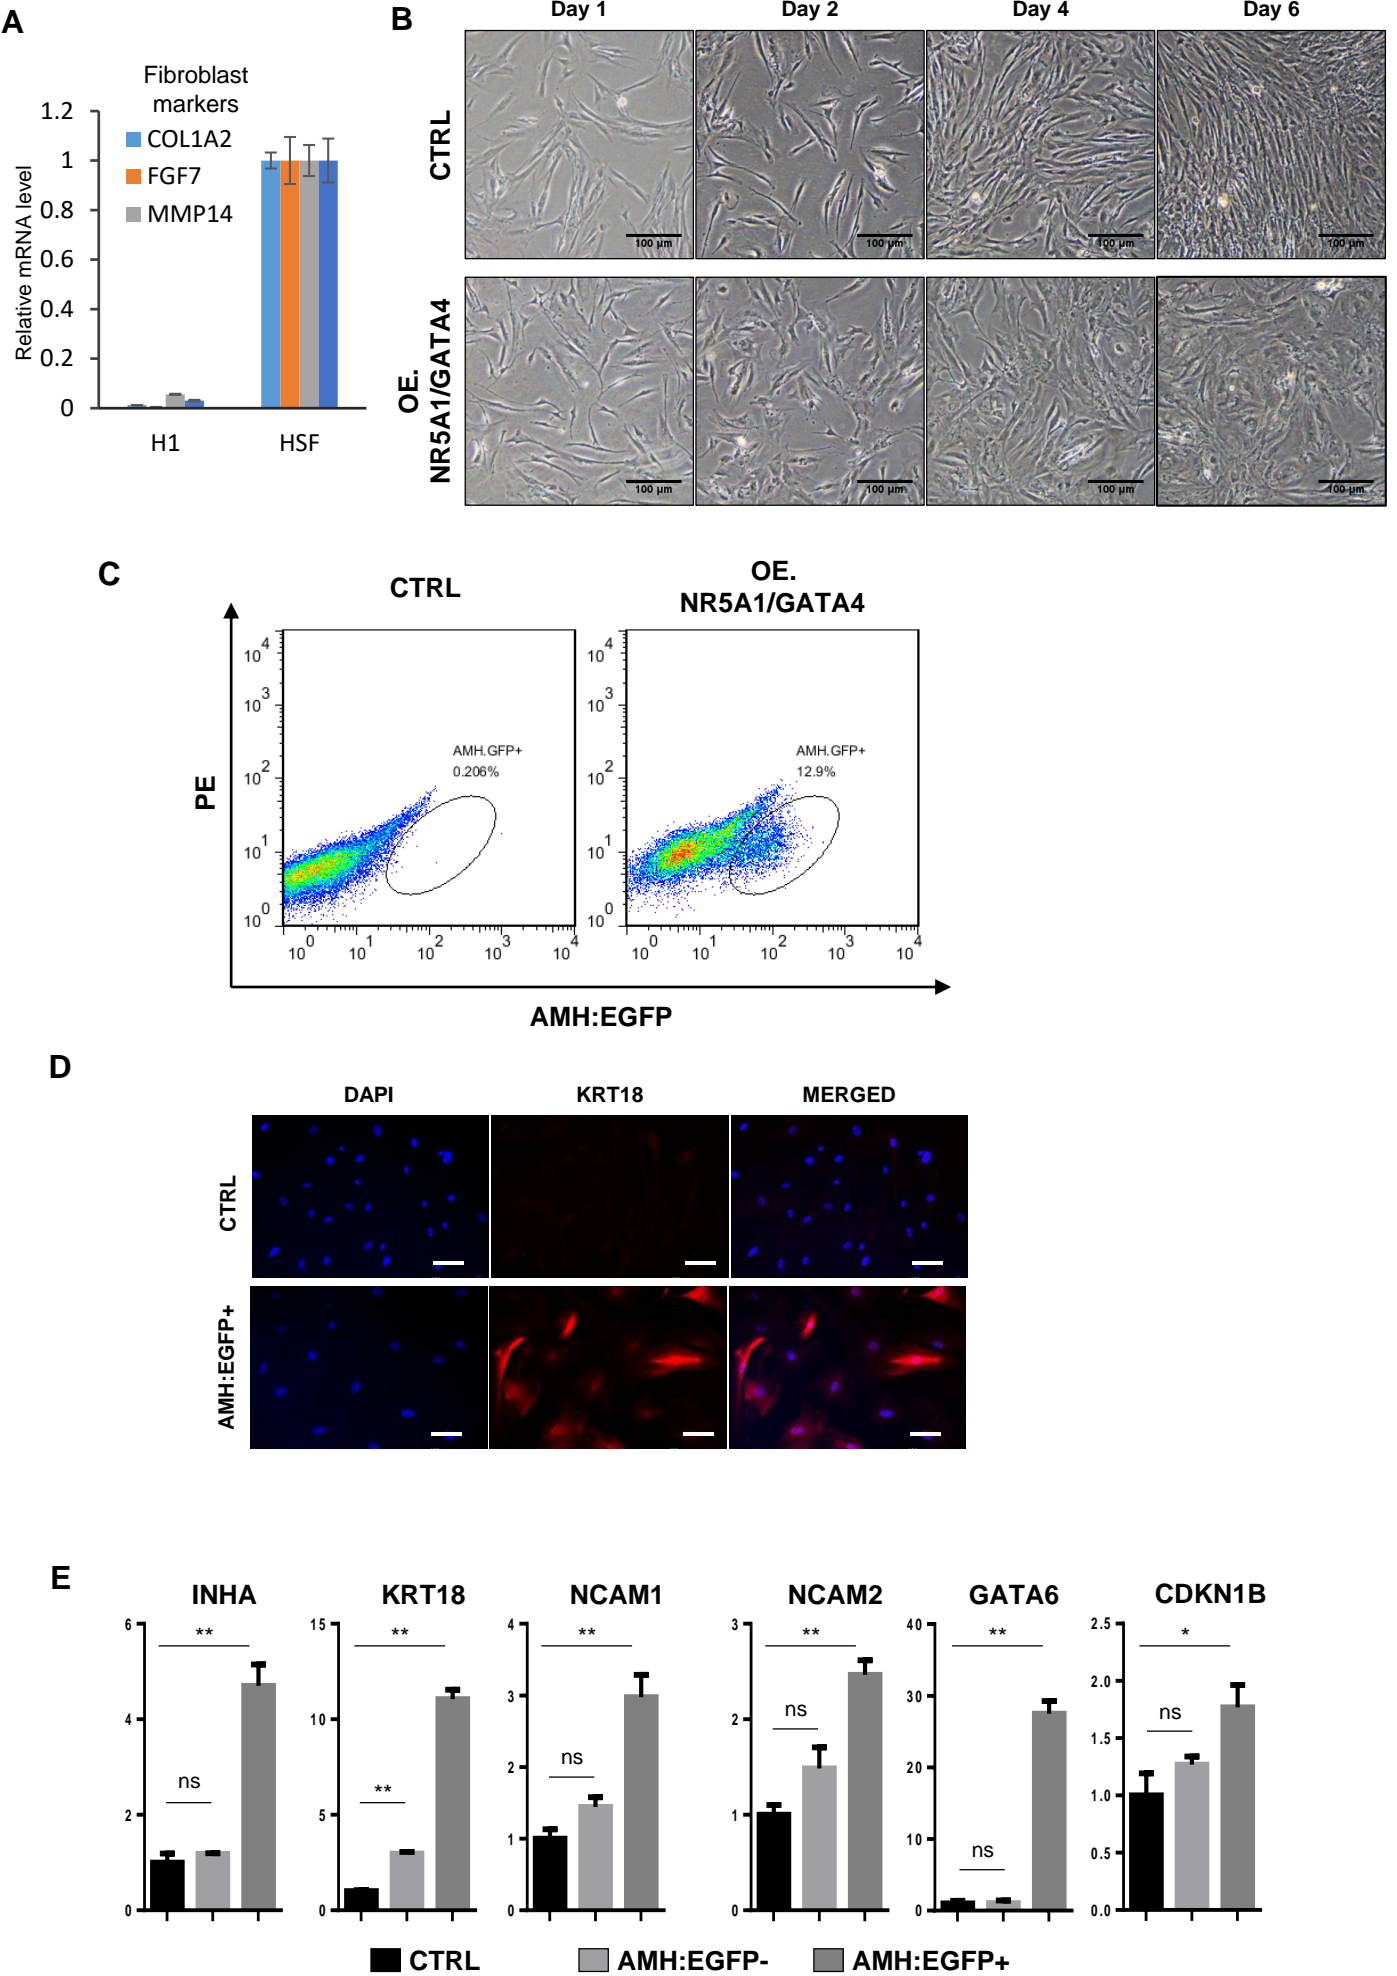

Supplement: supp [file elife-48767-supp-v1.zip › elife_poa_e48767_Figure_3_figure_supplement_5.pdf]

Figure 1-figure supplement 2

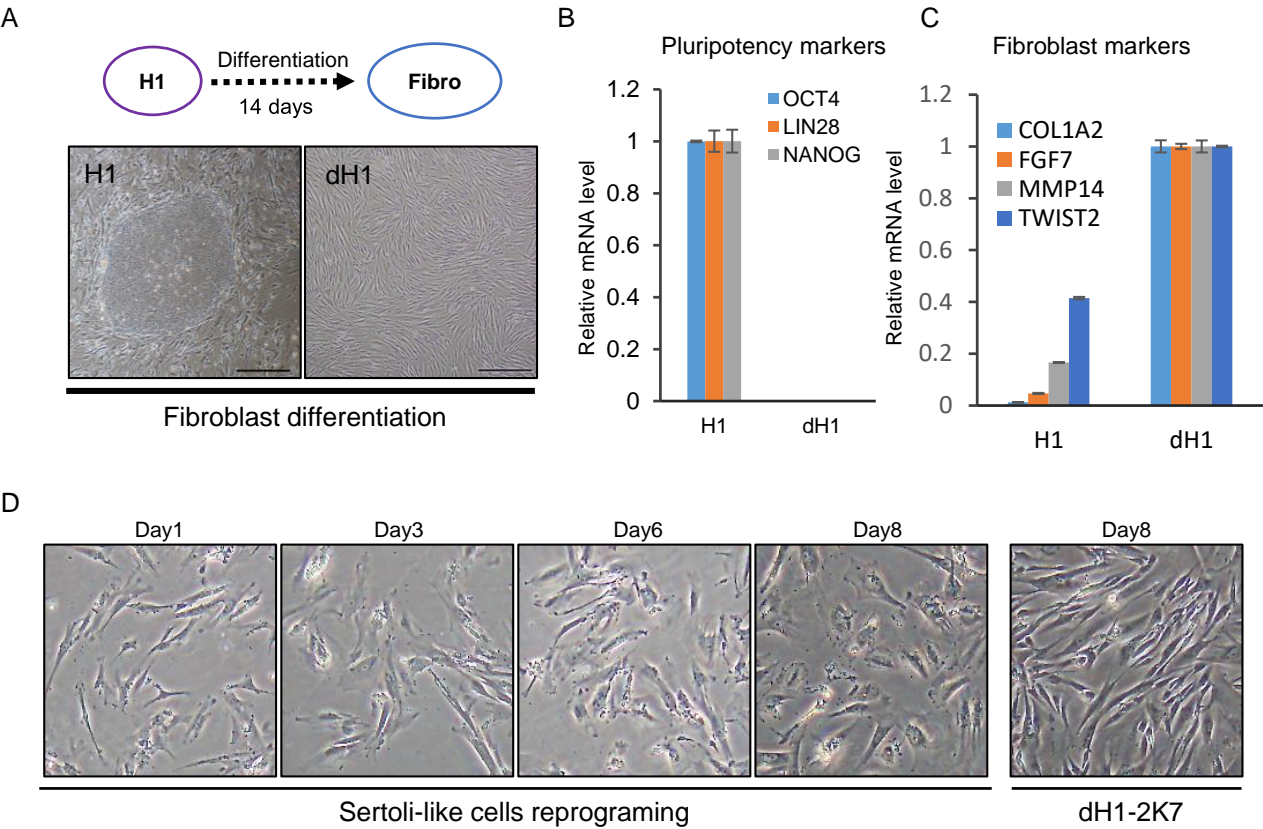

Supplement: supp [file elife-48767-supp-v1.zip › elife_poa_e48767_Figure_1_figure_supplement_2.pdf]

Figure 7-figure supplement 1

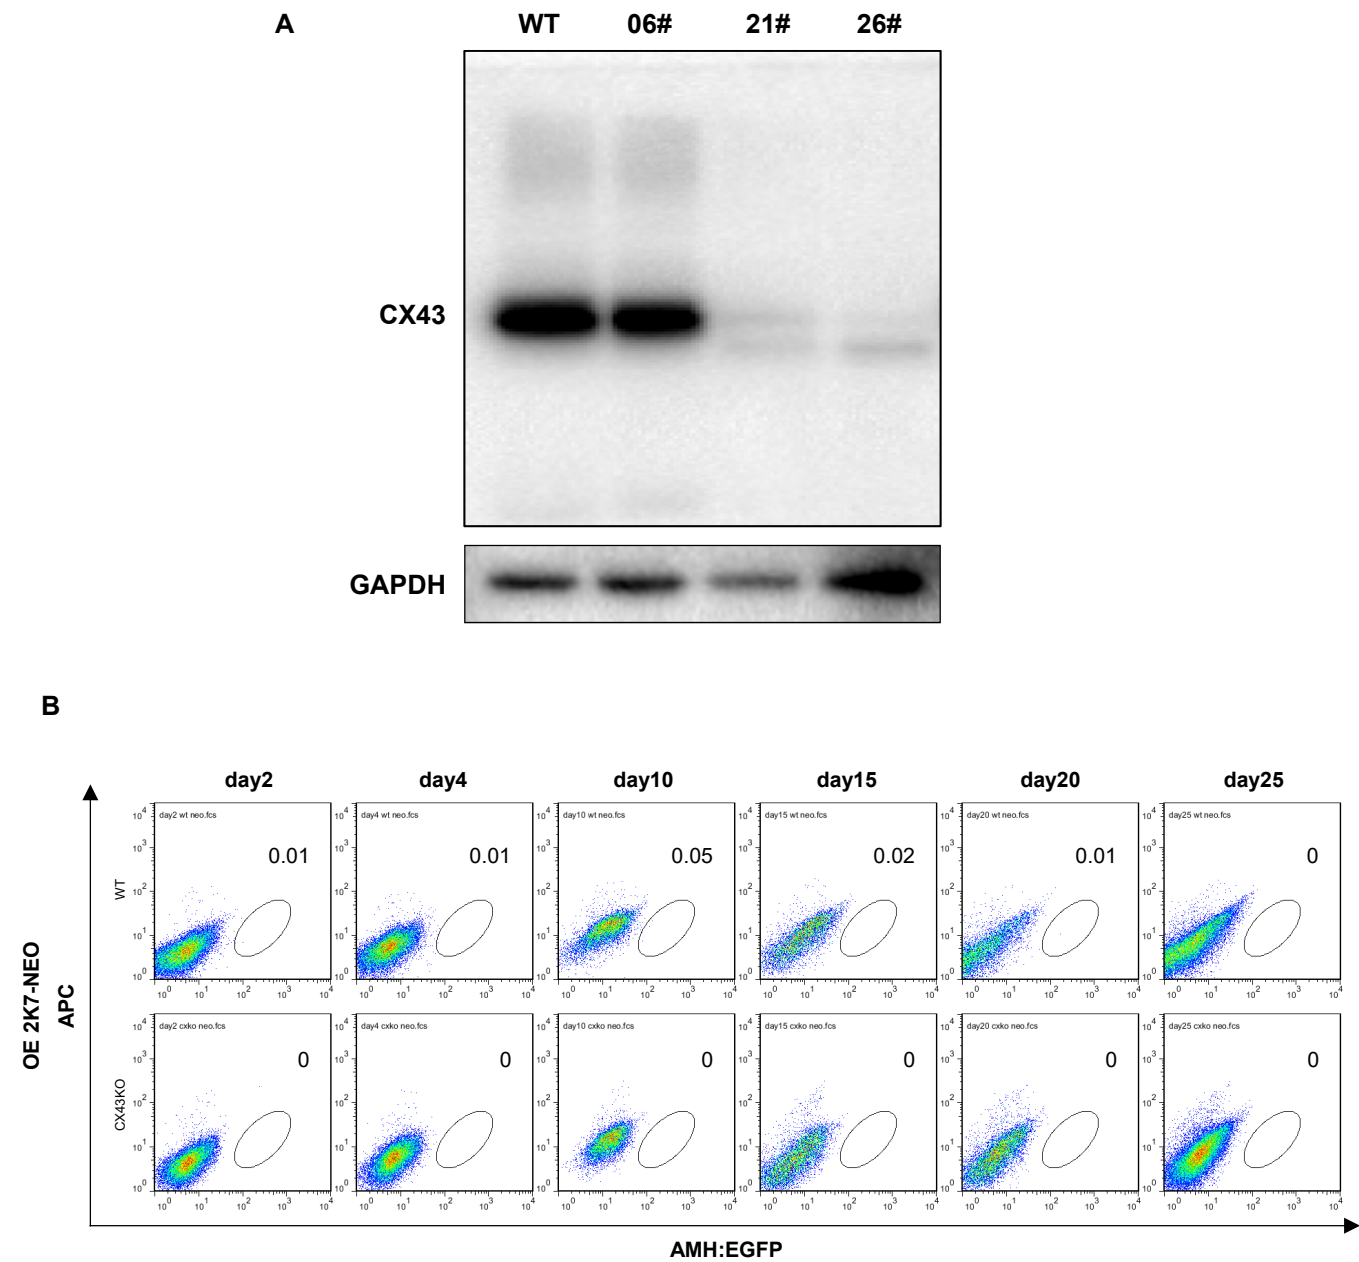

Supplement: supp [file elife-48767-supp-v1.zip › elife_poa_e48767_Figure_7_figure_supplement_1.pdf]
